# Supplementary material for: Safety and efficacy of extended release ketamine tablets in patients with treatment-resistant depression and anxiety: open label pilot study
Source: PubMed Central journal article supplement — Ther Adv Psychopharmacol. 2020 May 18;10:2045125320922474. doi: 10.1177/2045125320922474 (PMC7235665; doi:10.1177/2045125320922474), 2020-05-18
Supplement: Supplemental_Table.pdf [file Supplemental_Table.pdf]

Supplemental Table: Patients' clinical characteristics. The present study occurred in March 2017. The most recent ketamine dosing had occurred between 3 and 10 months prior to study entry.

|           | <b>Diagnoses</b>                                                                                                         | <b>Prior/Current Therapy</b>                                                                                                                                     | <b>Mood Scores at Screening</b> |
|-----------|--------------------------------------------------------------------------------------------------------------------------|------------------------------------------------------------------------------------------------------------------------------------------------------------------|---------------------------------|
| 1<br>F/22 | SAD since 6y, on-going<br>1 x MDE 2015, in remission                                                                     | P: Sertraline, venlafaxine,<br>propranolol, CBT. Ketamine 1mg/kg<br>sc 8-11/2016.<br>C: Venlafaxine                                                              | HAMA: 20<br>MADRS: 17<br>FQ: 50 |
| 2<br>M/29 | SAD since childhood, on-going<br>PTSD since 15y, on-going<br>MDE since 15y, intermittent, on-<br>going                   | P: Fluoxetine, sertraline, venlafaxine,<br>CBT, other psychotherapies.<br>Ketamine 1mg/kg sc 2-5/2016.<br>C: Citalopram, clonidine                               | HAMA: 23<br>MADRS: 29<br>FQ: 48 |
| 3<br>M/33 | SAD since 11, on-going<br>MDE intermittent, current<br>Bulimia, 20s, in remission                                        | P: Fluoxetine, citalopram, multiple<br>psychotherapies. Ketamine 1mg/kg<br>sc 10-12/2016<br>C: Venlafaxine, Gestalt<br>psychotherapy                             | HAMA: 17<br>MADRS: 32<br>FQ: 43 |
| 4<br>F/25 | SAD since 16y, on-going<br>MDE intermittent, current                                                                     | P: Citalopram, escitalopram,<br>venlafaxine, fluoxetine, sertraline,<br>multiple psychotherapies. Ketamine<br>1mg/kg sc 9-12/2016.<br>C: Quetiapine              | HAMA: 31<br>MADRS: 40<br>FQ: 53 |
| 5<br>F/33 | MDE since late teens,<br>intermittent, current<br>SAD since late teens, current<br>Alcohol use disorder, in<br>remission | P: ECT, citalopram, venlafaxine,<br>mirtazapine, lithium,<br>tranylcypromine, multiple<br>psychotherapies. Ketamine 1mg/kg<br>sc 9-12/2016.<br>C: Quetiapine     | HAMA: 15<br>MADRS: 40<br>FQ: 53 |
| 6<br>M/24 | GAD, SAD since 10y, on-going<br>MDE intermittent, current                                                                | P: Citalopram, paroxetine,<br>fluoxetine, mirtazapine, prior<br>psychotherapies. Ketamine 1mg/kg<br>sc 5-8/2016.<br>C: Venlafaxine, nortriptyline,<br>topiramate | HAMA: 28<br>MADRS: 27<br>FQ: 47 |
| 7<br>M/25 | SAD since 14y, on-going<br>MDE intermittent, current                                                                     | P: Sertraline, fluoxetine, quetiapine.<br>Ketamine 1mg/kg sc 8-11/2016.<br>C: Fluoxetine                                                                         | HAMA: 28<br>MADRS: 27<br>FQ: 47 |

Legend: FQ: Fear Questionnaire; GAD: Generalized Anxiety Disorder; HAMA:

Hamilton Anxiety Scale; MADRS: Montgomery-Asberg Depression Rating Scale;

MDE: Major Depressive Episode; SAD: Social Anxiety Disorder.
